# Supplementary material for: Valorization of ductile cast iron solid waste as a high-performance adsorbent for crystal violet removal: characterization, optimization, and mechanistic insights
Source: Royal Society of Chemistry journal article supplement (doi:10.1039/d6ra02129h), 2026-05-11
Supplement: d6ra02129h1.pdf [file d6ra02129h1.pdf]

# Valorization of Ductile Cast Iron Solid Waste as a High-Performance Adsorbent for Crystal Violet Removal: Characterization, Optimization, and Mechanistic Insights

Ibrahim M. Ibrahim<sup>a,b</sup>, A. M. Turkey<sup>b</sup>, Nasser Y. Mostafa<sup>b</sup>, Mai H. Roushdy<sup>a\*</sup>

---

## Section S1. Detailed BET N<sub>2</sub> Adsorption-Desorption Isotherm Analysis

According to the IUPAC classification, The N<sub>2</sub> adsorption desorption isotherm (Figure 2a) exhibits Type IV behavior, which is a hallmark of mesoporous materials and is accompanied by different adsorption features in the various regions of relative pressure: I. This gradual increase at medium pressure-range ( $P/P_0 = 0.1-0.8$ ) is attributed to the monolayer multilayer adsorption on mesopore walls, therefore meso-porosity is the main feature confirmed. II A significant nitrogen uptake happens at higher relative pressures ( $P/P_0 = 0.4-0.9$ ) and this is a result of micropore filling which accounts for approximately 20% of the total pore volume and suggests that there are small pores (<2 nm) present, III The strong nitrogen uptake that is accompanied with an H3-type hysteresis loop is a clear indication of mesopores capillary condensation (2-50 nm), where the steep desorption branch and gradually sloping adsorption branch are characteristics of slit-shaped pores or aggregates of plate-like particles with irregular pore sizes.

BJH pore size distribution analysis (Figure 2b) of the desorption branch confirms the presence of a multimodal pore size distribution with clearly separated mesopore populations. A main mesopore peak at 3.5-4.2 nm constitutes approximately 60% of the total pore volume. It is thus a highly developed mesoporous structure that is perfectly adapted in terms of efficient accessibility of crystal violet molecules; secondary mesopores are the result of interparticle voids between aggregated nanopores; and a broad distribution tail of up to 30-40 nm at the end, which comprises only about 15% of the pore volume, is a sign of structural heterogeneity and macropore entrances.

## Section S2. Stage-by-Stage TGA-DTG Analysis and Thermal Treatment Rationale

Thermogravimetric analysis coupled with derivative thermogravimetry (Figure 7) characterized thermal stability, decomposition behavior, and optimal regeneration temperature selection. TGA curve (weight % vs. temperature, 25-900°C, 10°C/min heating rate, air atmosphere) shows the total weight loss is 8.0% over 25-900°C range, indicating high thermal stability. Stage 1 (25-150°C) includes 2.8% weight loss with DTG endothermic peak at 85°C which happened due to Physisorbed water evaporation (surface moisture, capillary water in mesopores) and monolayer water coverage on MgO surface, reasonable for material stored at ambient humidity. Stage 2 (150-350°C) include 3.5% weight loss with DTG endothermic peak at 285°C which happened due to surface dehydroxylation ( $2 \text{Mg-OH} \rightarrow \text{Mg-O-Mg} + \text{H}_2\text{O}$ ) and decomposition of residual organic contaminants (Organic residues  $\rightarrow \text{CO}_2 + \text{H}_2\text{O}$ ). Stage 3 (350-550°C) which includes 1.2% weight loss with weak DTG peak at 420°C due to further dehydroxylation of more stable Mg-OH groups (interior layers, strongly bound) and structural water removal from hydrated phases as relatively small loss indicates most volatile/labile species removed by 350°C, validating 400°C activation and 300°C regeneration temperatures<sup>85</sup>. Stage 4 (550-900°C) with changes <0.5% and no significant DTG peaks because of Minimal change happened to MgO, ZnO, Fe<sub>2</sub>O<sub>3</sub> phases that confirms material purity and safety (no spontaneous combustion risk). No phase transitions because of the absence of sharp endo/exothermic events at characteristic temperatures confirms no polymorphic transitions (MgO cubic structure stable), no melting, no decomposition of major phases.

Based on the thermal analysis data the thermal activation (400°C, 3 h) as this temperature removes physisorbed water (Stage 1) and surface hydroxyl groups (Stage 2), creating coordinatively unsaturated Mg<sup>2+</sup> sites ideal for adsorption. The regeneration temperature (300°C, 2 h) within Stage 2 region, sufficient to decompose adsorbed organic dye (CV expected decomposition 200-350°C based on TGA of pure CV, not shown) while avoiding excessive dehydroxylation that would require rehydration. Post-regeneration, material spontaneously rehydroxylates

upon ambient air exposure, restoring active sites. Above 450-500°C (Stage 3 completion), sintering risk increases. Particle growth and surface area loss observed when heated >600°C (surface area drops to 198 m<sup>2</sup>/g at 600°C, 162 m<sup>2</sup>/g at 800°C in separate experiments). Therefore, all thermal treatments maintained ≤400°C. DCI waste withstands multiple regeneration cycles (15 tested) at 300°C without structural degradation, contrasting with some organic adsorbents (activated carbon oxidizes in air >400°C, some biochar unstable >350°C). No exothermic decomposition, no rapid gas evolution (DTG slopes gradual), indicates safe handling and processing. Material non-flammable, non-explosive under normal conditions.

## Table S1. Kinetic Model Statistical Comparison

Table S1: Comparison of Kinetic Models for the Adsorption of CV onto DCI Waste ( $C_0 = 40$  mg/L, Dose = 6.2 g/L, pH = 8.0, T = 25 °C).  $q_{e,exp} = 0.121$  mg/g (Equilibrium capacity from experiment). Determined by non-linear regression. Percentage error of  $q_e = |q_{e,calc} - q_{e,exp}| / q_e$ .

| Kinetic Model       | R <sup>2</sup>                                                         | $q_{e,calc}$ (mg g <sup>-1</sup> ) | $q_{e,exp}$ (mg g <sup>-1</sup> ) | $q_e$ error (%) | Assessment                                                |
|---------------------|------------------------------------------------------------------------|------------------------------------|-----------------------------------|-----------------|-----------------------------------------------------------|
| Pseudo-first-order  | 0.9870                                                                 | 0.118                              | 0.121                             | 2.5             | ✓ Best fit — excellent R <sup>2</sup> and <3% $q_e$ error |
| Pseudo-second-order | 0.8499                                                                 | 0.087                              | 0.121                             | 28.1            | ✗ Poor fit — large $q_e$ discrepancy (28%)                |
| Elovich             | NR                                                                     | NR                                 | 0.121                             | NR              | Chemisorption-surface model; qualitative only             |
| Weber–Morris (IPD)  | Stage-dependent:<br>Stage 1: 0.994<br>Stage 2: 0.989<br>Stage 3: 0.982 | NR                                 | 0.121                             | NR              | Multi-stage; not a single-equation fit                    |
| Boyd                | NR                                                                     | NR                                 | 0.121                             | NR              | Mechanistic diffusion model; not regression-based         |

Key Points: NR = not relevant; The Weber-Morris (IPD) and Boyd models are mechanistic multiple-stage models, which cannot be used to determine a single regression coefficient R<sup>2</sup> or  $q_e$  value. The pseudo-first-order kinetic model is validated due to its high R<sup>2</sup> value (0.9870) and minimum  $q_e$  error percentage (2.5%). Therefore, the adsorption process is physisorption. The pseudo-second-order kinetic model is invalid due to its low R<sup>2</sup> value (0.8499) and high  $q_e$  error percentage (28.1%). Thus, the process does not involve chemisorption.
